# Supplementary material for: Interaction of the Fungal Metabolite Harzianic Acid with Rare-Earth Cations (La3+, Nd3+, Sm3+, Gd3+)
Source: MDPI journal article supplement (doi:10.3390/molecules27061959), 2022-03-17
Supplement: s1 [file s1]

# Interaction of the Fungal Metabolite Harzianic Acid with Rare-Earth Cations ( $\text{La}^{3+}$ , $\text{Nd}^{3+}$ , $\text{Sm}^{3+}$ , $\text{Gd}^{3+}$ )

Gaetano De Tommaso <sup>1,†</sup>, Maria Michela Salvatore <sup>1,2,†</sup>, Antonietta Siciliano <sup>3</sup>, Alessia Staropoli <sup>2,4</sup>, Francesco Vinale <sup>2,5,6</sup>, Rosario Nicoletti <sup>4,7</sup>, Marina DellaGreca <sup>1</sup>, Marco Guida <sup>3</sup>, Francesco Salvatore <sup>1,\*</sup>, Mauro Iuliano <sup>1,\*</sup>, Anna Andolfi <sup>1,6,\*</sup>

<sup>1</sup> Department of Chemical Sciences, University of Naples Federico II, Naples 80126, Italy; [gaetano.detommaso@unina.it](mailto:gaetano.detommaso@unina.it) (G.D.T.), [mariamichela.salvatore@unina.it](mailto:mariamichela.salvatore@unina.it) (M.M.S.), [dellagre@unina.it](mailto:dellagre@unina.it) (M.DG)

<sup>2</sup> Institute for Sustainable Plant Protection, National Research Council, Portici 80055 (NA), Italy;

<sup>3</sup> Department of Biology, University of Naples Federico II, Naples, Italy, [antonietta.siciliano@unina.it](mailto:antonietta.siciliano@unina.it) (A.S.), [marco.guida@unina.it](mailto:marco.guida@unina.it) (M.G.)

<sup>4</sup> Department of Agricultural Sciences, University of Naples Federico II, Portici 80055 (NA), Italy; [alessia.staropoli@unina.it](mailto:alessia.staropoli@unina.it) (A.S.)

<sup>5</sup> Department of Veterinary Medicine and Animal Productions, University of Naples Federico II, 80137 Naples, Italy; [frvinale@unina.it](mailto:frvinale@unina.it) (F.V.)

<sup>6</sup> BAT Center - Interuniversity Center for Studies on Bioinspired Agro-Environmental Technology, University of Naples Federico II, Portici (NA) 80055, Italy

<sup>7</sup> Council for Agricultural Research and Economics, Research Centre for Olive, Fruit and Citrus Crops, 81100 Caserta, Italy; [rosario.nicoletti@crea.gov.it](mailto:rosario.nicoletti@crea.gov.it) (R.N.)

\* Correspondence: [frsalvat@unina.it](mailto:frsalvat@unina.it) (F.S.), [mauro.iuliano@unina.it](mailto:mauro.iuliano@unina.it) (M.I.); [andolfi@unina.it](mailto:andolfi@unina.it) (A.A.); Tel.: +39-081-2539179 (A.A.)

† These authors contributed equally to this work.

**Figure S1.** Far-UV circular dichroism (CD) spectra (optical path 0.2 cm) of harziaic acid in  $\text{CH}_3\text{OH}/0.1 \text{ M NaClO}_4$  (50:50  $w/w$ ) at different pH values:  $C_{\text{H}_2\text{L}} \leq 1.72 \times 10^{-4} \text{ M}$ .

**Figure S2.** Far-UV circular dichroism (CD) spectra (optical path 1 cm) of  $\text{La}(\text{ClO}_4)_3$  in  $\text{CH}_3\text{OH}/0.1 \text{ M NaClO}_4$  (50:50  $w/w$ ) at different pH values: (A)  $\frac{C_{\text{H}_2\text{L}}}{C_{\text{La}}} = 0.995$ ,  $C_{\text{La}} \leq 3.82 \times 10^{-5} \text{ M}$ ; (B)  $\frac{C_{\text{H}_2\text{L}}}{C_{\text{La}}} = 1.992$ ,  $C_{\text{La}} \leq 3.99 \times 10^{-5} \text{ M}$ .

**Figure S3.** Far-UV circular dichroism (CD) spectra (optical path 0.2 cm) of  $\text{NdCl}_3$  in  $\text{CH}_3\text{OH}/0.1 \text{ M NaClO}_4$  (50:50  $w/w$ ) at different pH values: (A)  $\frac{C_{\text{H}_2\text{L}}}{C_{\text{Nd}}} = 1.000$ ,  $C_{\text{Nd}} \leq 23.3 \times 10^{-4} \text{ M}$ ; (B)  $\frac{C_{\text{H}_2\text{L}}}{C_{\text{Nd}}} = 1.935$ ,  $C_{\text{Nd}} \leq 8.26 \times 10^{-5} \text{ M}$ .

**Figure S4.** Far-UV circular dichroism (CD) spectra (optical path 1 cm) of  $\text{Sm}(\text{ClO}_4)_3$  in  $\text{CH}_3\text{OH}/0.1 \text{ M NaClO}_4$  (50:50  $w/w$ ) at different pH values: (A)  $\frac{C_{\text{H}_2\text{L}}}{C_{\text{Sm}}} = 1.051$ ,  $C_{\text{Sm}} \leq 8.04 \times 10^{-5} \text{ M}$ ; (B)  $\frac{C_{\text{H}_2\text{L}}}{C_{\text{Sm}}} = 2.02$ ,  $C_{\text{Sm}} \leq 3.01 \times 10^{-5} \text{ M}$ .

**Figure S5.** Far-UV circular dichroism (CD) spectra (optical path 1 cm) of  $\text{GdCl}_3$  in  $\text{CH}_3\text{OH}/0.1 \text{ M NaClO}_4$  (50:50  $w/w$ ) at different pH values: (A)  $\frac{C_{\text{H}_2\text{L}}}{C_{\text{Gd}}} = 1.00$ ,  $C_{\text{Gd}} \leq 6.44 \times 10^{-5} \text{ M}$ ; (B)  $\frac{C_{\text{H}_2\text{L}}}{C_{\text{Gd}}} = 1.99$ ,  $C_{\text{Gd}} \leq 4.57 \times 10^{-5} \text{ M}$ .

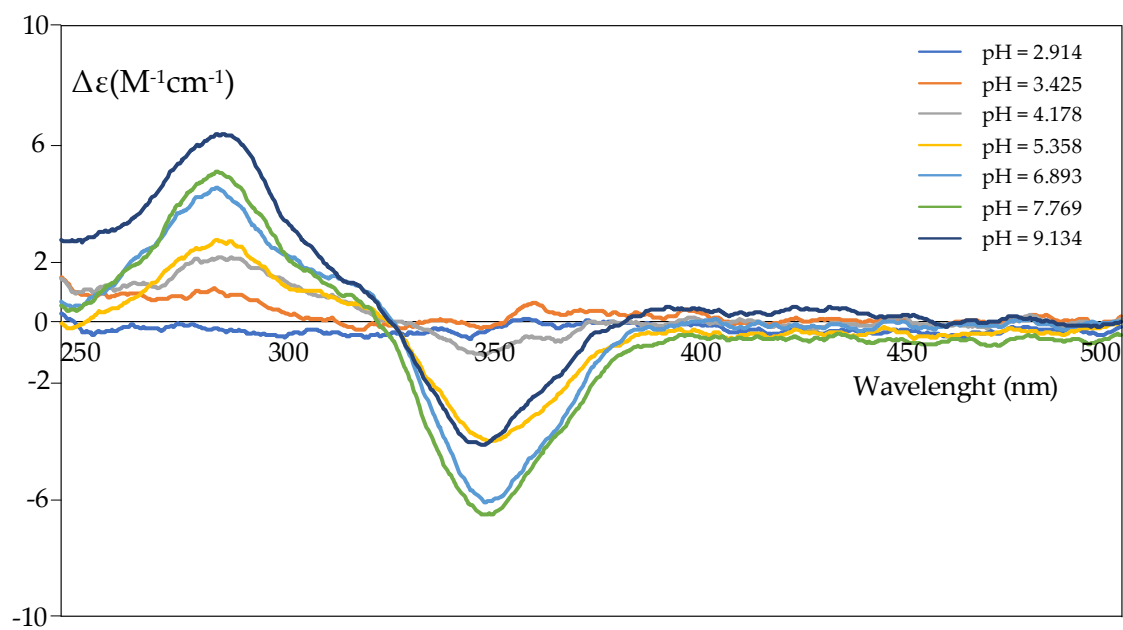

**Figure S1.** Far-UV circular dichroism (CD) spectra (optical path 0.2 cm) of harziaic acid in  $\text{CH}_3\text{OH}/0.1 \text{ M NaClO}_4$  (50:50  $w/w$ ) at different pH values:  $C_{\text{H}_2\text{L}} \leq 1.72 \times 10^{-4} \text{ M}$ .

(A)

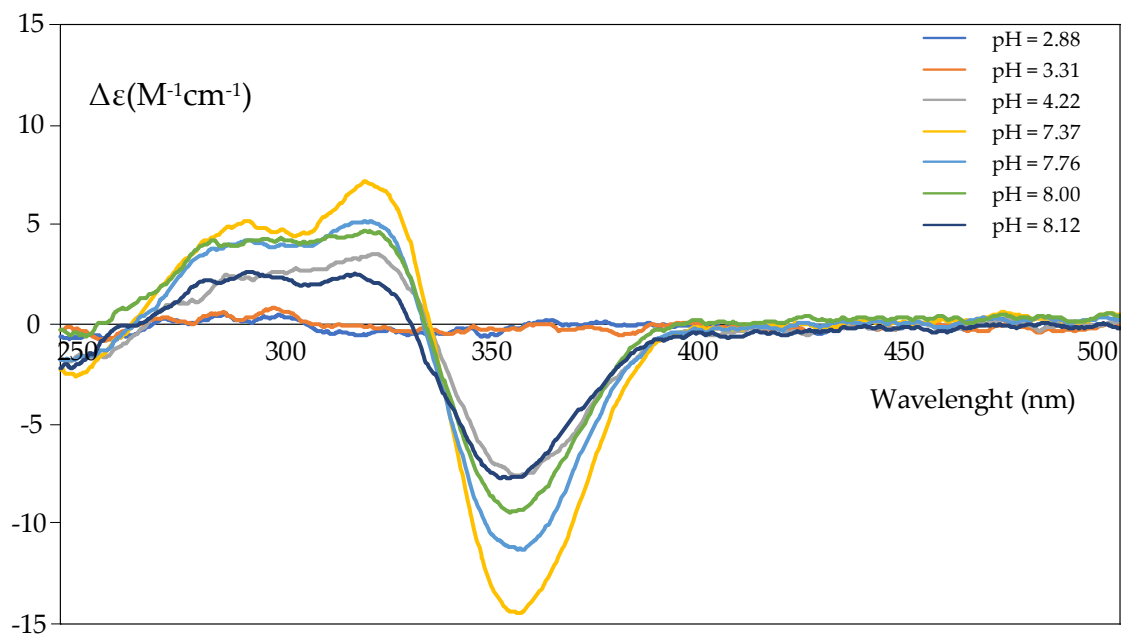

(B)

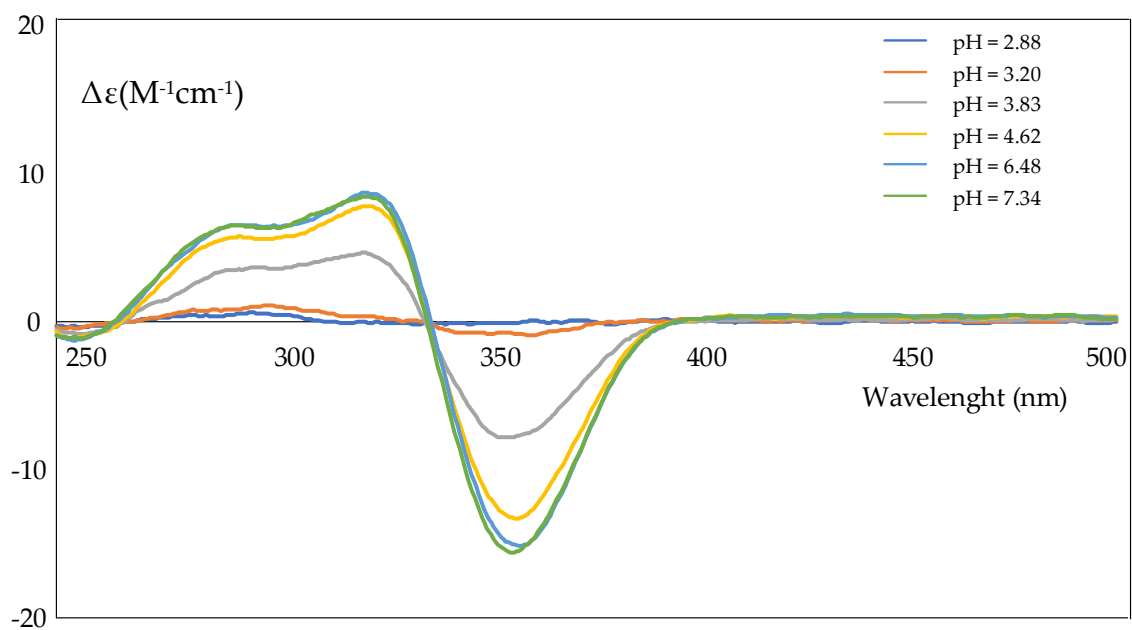

**Figure S2.** Far-UV circular dichroism (CD) spectra (optical path 1 cm) of  $\text{La}(\text{ClO}_4)_3$  in  $\text{CH}_3\text{OH}/0.1 \text{ M NaClO}_4$  (50:50  $w/w$ ) at different pH values: (A)  $\frac{C_{\text{H}_2\text{L}}}{C_{\text{La}}} = 0.995$ ,  $C_{\text{La}} \leq 3.82 \times 10^{-5} \text{ M}$ ; (B)  $\frac{C_{\text{H}_2\text{L}}}{C_{\text{La}}} = 1.992$ ,  $C_{\text{La}} \leq 3.99 \times 10^{-5} \text{ M}$ .

(A)

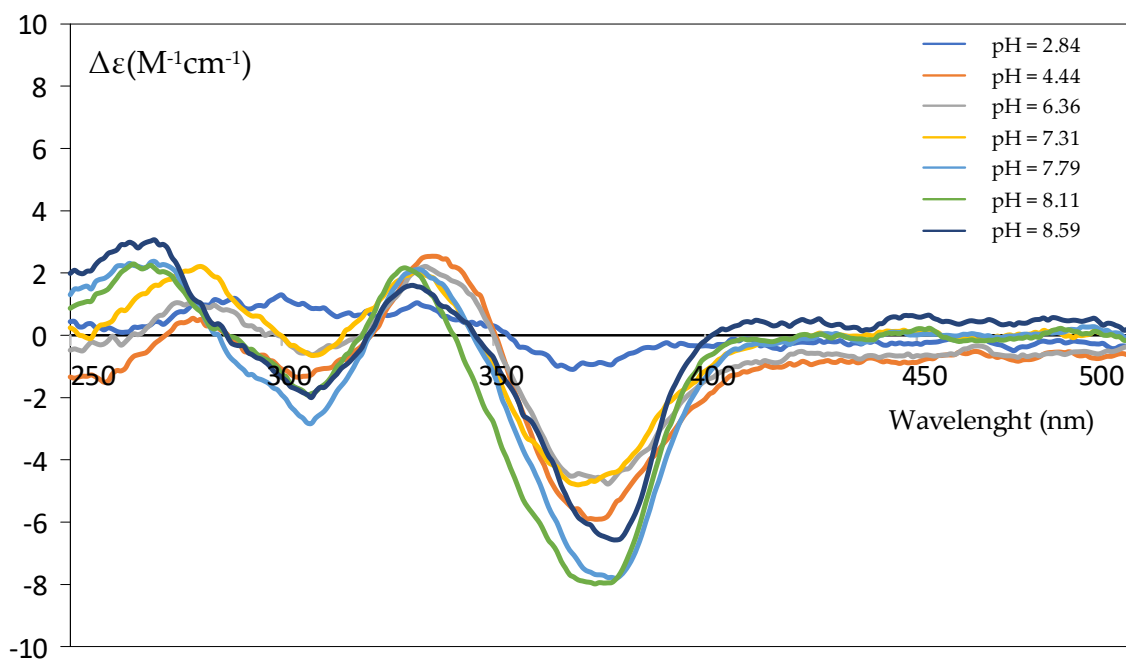

(B)

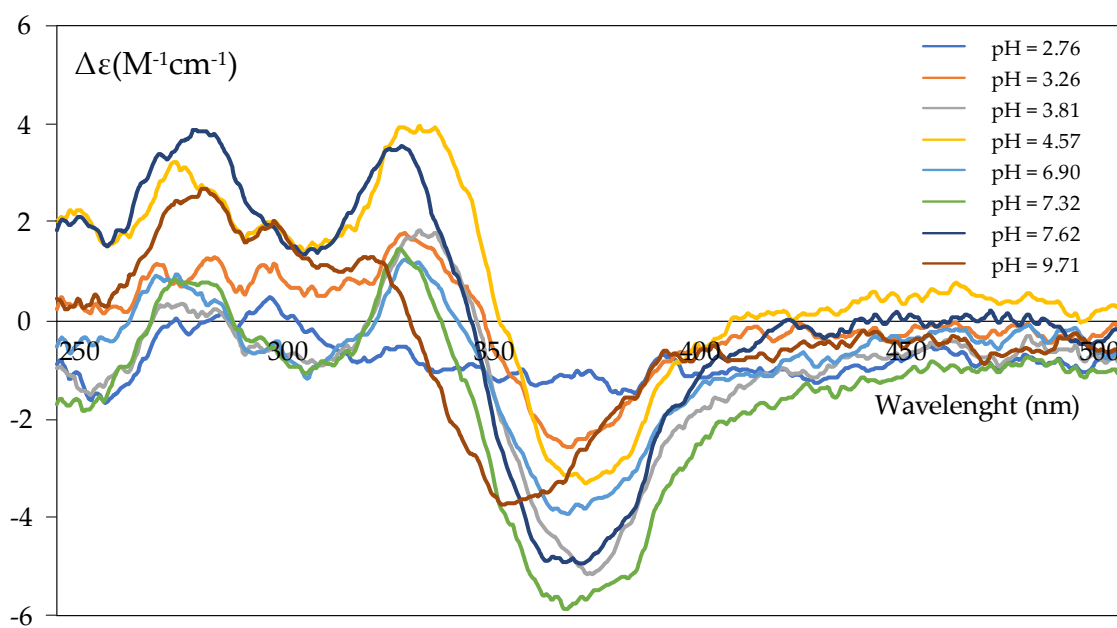

**Figure S3.** Far-UV circular dichroism (CD) spectra (optical path 0.2 cm) of NdCl<sub>3</sub> in CH<sub>3</sub>OH/0.1 M NaClO<sub>4</sub> (50:50 w/w) at different pH values: (A)  $\frac{C_{H_2L}}{C_{Nd}} = 1.000$ ,  $C_{Nd} \leq 23.3 \times 10^{-4}$  M; (B)  $\frac{C_{H_2L}}{C_{Nd}} = 1.935$ ,  $C_{Nd} \leq 8.26 \times 10^{-5}$  M.

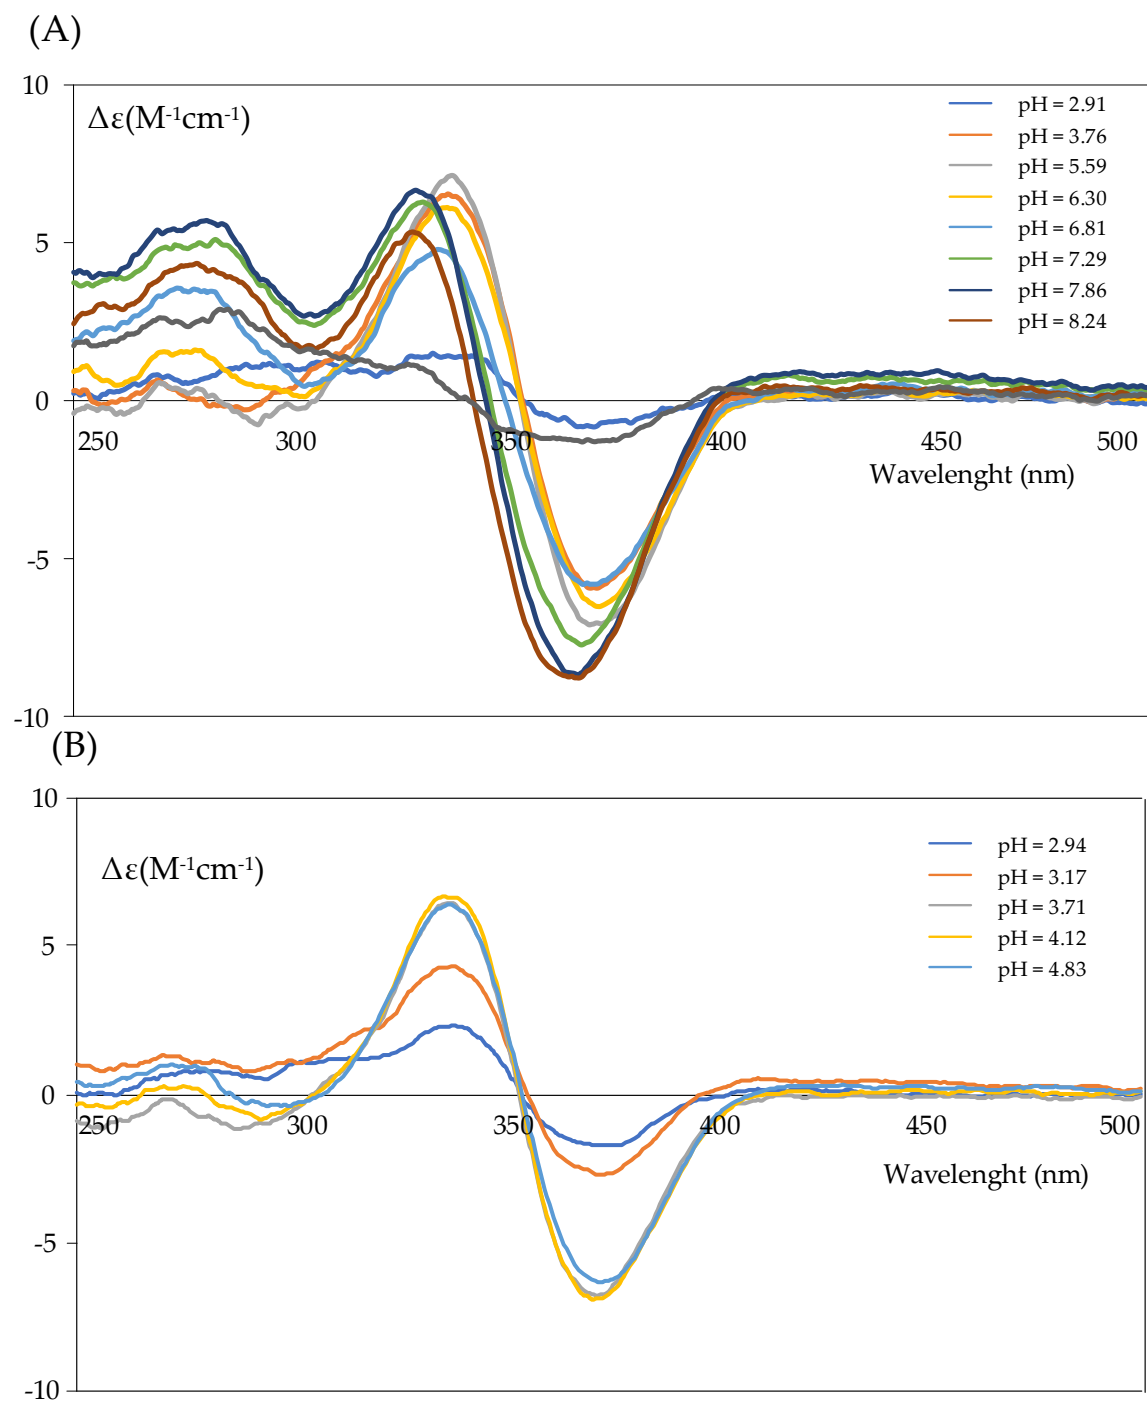

**Figure S4.** Far-UV circular dichroism (CD) spectra (optical path 1 cm) of  $\text{Sm}(\text{ClO}_4)_3$  in  $\text{CH}_3\text{OH}/0.1 \text{ M NaClO}_4$  (50:50 *w/w*) at different pH values: (A)  $\frac{c_{\text{H}_2\text{L}}}{c_{\text{Sm}}} = 1.051$ ,  $c_{\text{Sm}} \leq 8.04 \times 10^{-5} \text{ M}$ ; (B)  $\frac{c_{\text{H}_2\text{L}}}{c_{\text{Sm}}} = 2.02$ ,  $c_{\text{Sm}} \leq 3.01 \times 10^{-5} \text{ M}$ .

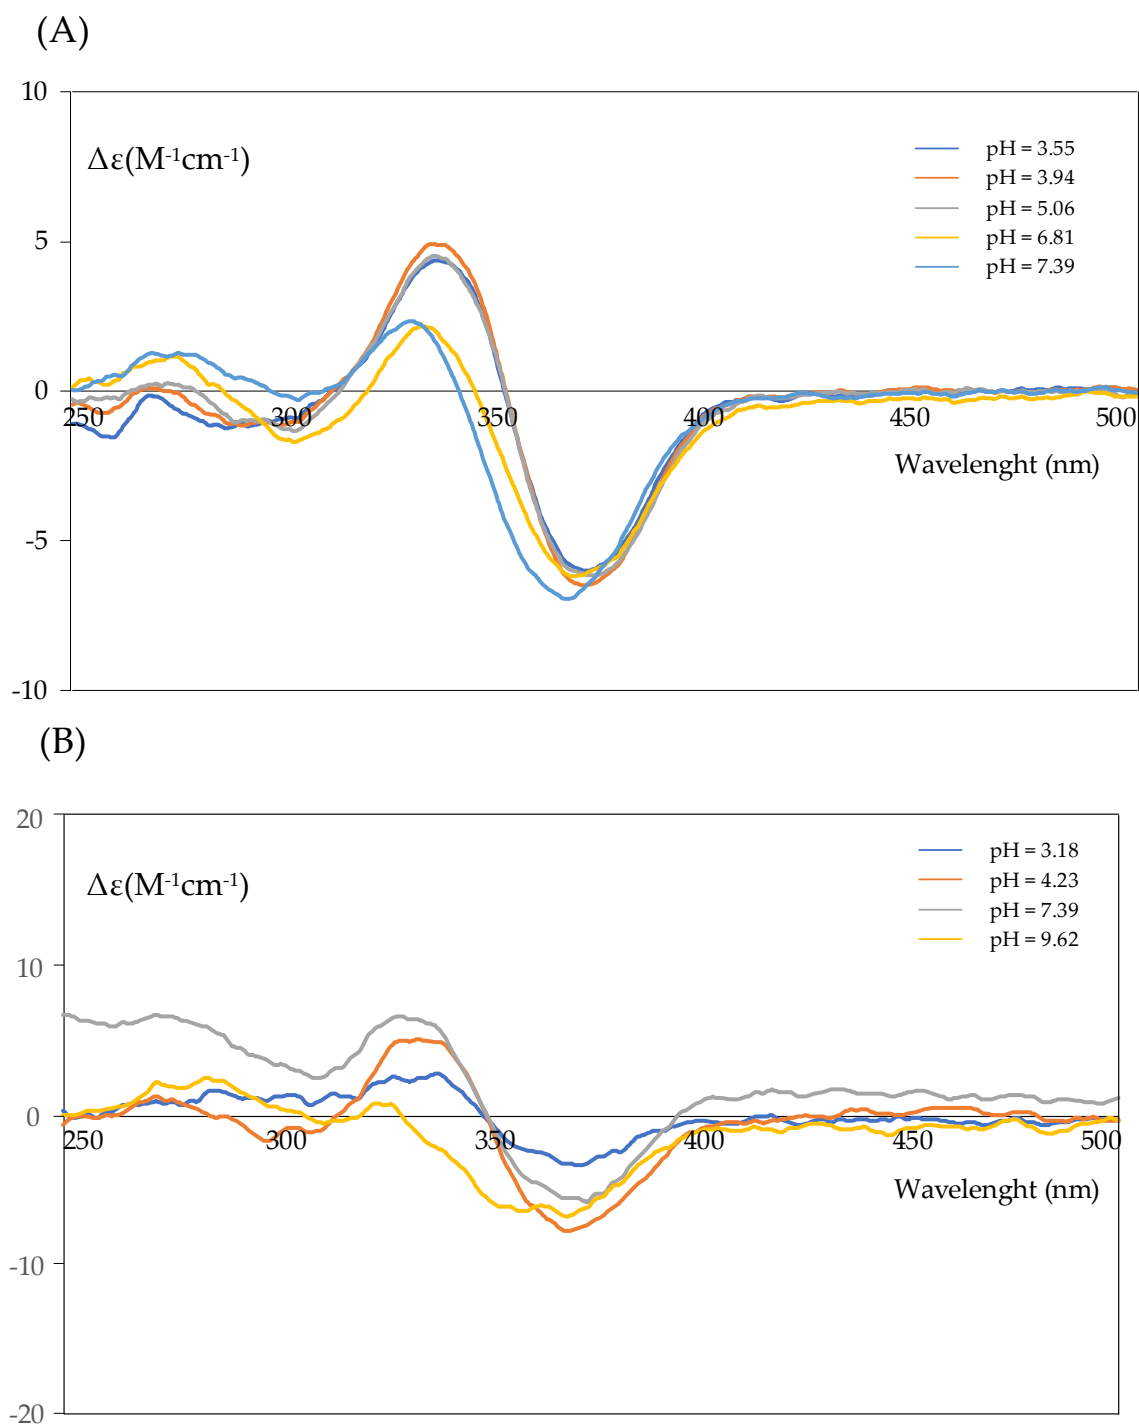

**Figure S5.** Far-UV circular dichroism (CD) spectra (optical path 1 cm) of  $\text{GdCl}_3$  in  $\text{CH}_3\text{OH}/0.1 \text{ M NaClO}_4$  (50:50 *w/w*) at different pH values: (A)  $\frac{C_{\text{H}_2\text{L}}}{C_{\text{Gd}}} = 1.00$ ,  $C_{\text{Gd}} \leq 6.44 \times 10^{-5} \text{ M}$ ; (B)  $\frac{C_{\text{H}_2\text{L}}}{C_{\text{Gd}}} = 1.99$ ,  $C_{\text{Gd}} \leq 4.57 \times 10^{-5} \text{ M}$ .
